# Supplementary material
Source: PubMed Central journal article supplement (PMC3261048)
Supplement: supp_51.11.5445_10-5526_Supp_Table.pdf [file supp_51.11.5445_10-5526_Supp_Table.pdf]

Supplementary Table S1.

Mutual correlation of cytokines in uveal melanoma patients.

|        | IL-6                    | IL-10 | bFGF   | GM-CSF | IP-10 | MCP-1 | MIP-1a | RANTES | VEGF   | MCP-3 | MIF   | TRAIL  | ICAM-1 | VCAM-1 |
|--------|-------------------------|-------|--------|--------|-------|-------|--------|--------|--------|-------|-------|--------|--------|--------|
| IL-6   | Correlation Coefficient | -0.09 | -0.22  | 0.59** | 0.02  | 0.04  | -0.11  | 0.78** | 0.31   | -0.08 | 0.05  | -0.26  | 0.31   | 0.49** |
|        | p-value                 | 0.62  | 0.19   | <0.01  | 0.91  | 0.84  | 0.53   | <0.01  | 0.06   | 0.66  | 0.80  | 0.13   | 0.06   | <0.01  |
| IL-10  | Correlation Coefficient |       | 0.57** | 0.21   | 0.26  | 0.40* | 0.18   | 0.16   | 0.64** | 0.30  | 0.24  | 0.05   | -0.02  | -0.17  |
|        | p-value                 |       | <0.01  | 0.22   | 0.13  | 0.02  | 0.28   | 0.36   | <0.01  | 0.07  | 0.20  | 0.79   | 0.89   | 0.31   |
| bFGF   | Correlation Coefficient |       |        | -0.12  | 0.14  | 0.07  | 0.16   | -0.19  | 0.33*  | -0.18 | 0.35* | 0.02   | 0.08   | -0.09  |
|        | p-value                 |       |        | 0.50   | 0.42  | 0.67  | 0.36   | 0.25   | 0.04   | 0.28  | 0.04  | 0.92   | 0.65   | 0.61   |
| GM-CSF | Correlation Coefficient |       |        |        | 0.09  | 0.12  | 0.26   | 0.70** | 0.38*  | 0.31  | -0.09 | 0.17   | 0.13   | 0.25   |
|        | p-value                 |       |        |        | 0.60  | 0.49  | 0.12   | <0.01  | 0.02   | 0.06  | 0.62  | 0.31   | 0.44   | 0.14   |
| IP-10  | Correlation Coefficient |       |        |        |       | 0.25  | 0.17   | 0.32   | 0.22   | 0.02  | -0.01 | -0.12  | 0.15   | 0.13   |
|        | p-value                 |       |        |        |       | 0.13  | 0.32   | 0.06   | 0.20   | 0.90  | 0.95  | 0.47   | 0.37   | 0.45   |
| MCP-1  | Correlation Coefficient |       |        |        |       |       | 0.33*  | 0.43** | 0.26   | 0.36* | 0.15  | 0.21   | 0.10   | -0.08  |
|        | p-value                 |       |        |        |       |       | 0.04   | 0.01   | 0.13   | 0.03  | 0.38  | 0.21   | 0.55   | 0.62   |
| MIP-1a | Correlation Coefficient |       |        |        |       |       |        | 0.16   | -0.06  | 0.31  | 0.17  | 0.47** | 0.02   | -0.17  |
|        | p-value                 |       |        |        |       |       |        | 0.38   | 0.75   | 0.07  | 0.33  | <0.01  | 0.90   | 0.30   |
| RANTES | Correlation Coefficient |       |        |        |       |       |        |        | 0.38*  | 0.21  | -0.02 | 0.06   | 0.25   | 0.35*  |
|        | p-value                 |       |        |        |       |       |        |        | 0.02   | 0.21  | 0.91  | 0.73   | 0.14   | 0.03   |
| VEGF   | Correlation Coefficient |       |        |        |       |       |        |        |        | 0.07  | 0.15  | -0.22  | 0.21   | 0.38*  |
|        | p-value                 |       |        |        |       |       |        |        |        | 0.67  | 0.38  | 0.19   | 0.21   | 0.02   |
| MCP-3  | Correlation Coefficient |       |        |        |       |       |        |        |        |       | -0.06 | 0.56** | -0.27  | -0.20  |
|        | p-value                 |       |        |        |       |       |        |        |        |       | 0.74  | <0.01  | 0.11   | 0.23   |
| MIF    | Correlation Coefficient |       |        |        |       |       |        |        |        |       |       | 0.16   | 0.09   | -0.07  |
|        | p-value                 |       |        |        |       |       |        |        |        |       |       | 0.33   | 0.60   | 0.70   |
| TRAIL  | Correlation Coefficient |       |        |        |       |       |        |        |        |       |       |        | -0.09  | -0.36* |
|        | p-value                 |       |        |        |       |       |        |        |        |       |       |        | 0.59   | 0.03   |
| ICAM-1 | Correlation Coefficient |       |        |        |       |       |        |        |        |       |       |        |        | 0.54** |
|        | p-value                 |       |        |        |       |       |        |        |        |       |       |        |        | <0.01  |
| VCAM-1 | Correlation Coefficient |       |        |        |       |       |        |        |        |       |       |        |        |        |
|        | p-value                 |       |        |        |       |       |        |        |        |       |       |        |        |        |

\*\*. Correlation is significant at the 0.01 level (2-tailed).

\*. Correlation is significant at the 0.05 level (2-tailed).
